# Supplementary material
Source: PubMed Central journal article supplement (PMC6439571)
Supplement: jamadermatol-155-39-s001.pdf [file jamadermatol-155-39-s001.pdf]

## Supplementary Online Content

Ghiasvand R, Robsahm TE, Green AC, et al. Association of phenotypic characteristics and UV radiation exposure with risk of melanoma on different body sites. *JAMA Dermatol*. Published online

November 21, 2018. doi:10.1001/jamadermatol.2018.3964

**eFigure.** Flow Diagram of Study Sample From the Norwegian Women and Cancer (NOWAC) Study

**eTable 1.** Odds Ratios (ORs) and 95% CIs for Age at Diagnosis, Subtype and Breslow Thickness by Body Sites of Melanoma

**eTable 2.** Relative Risks (RRs) and 95% CIs for Joint Effects of Hair Color, Number of Large Asymmetric Nevi on Legs, Number of Small Symmetric Nevi on Arms/Legs, and Freckling When Sunbathing, for Risk of Melanoma Overall and Site Specific

This supplementary material has been provided by the authors to give readers additional information about their work.

**eFigure.** Flow Diagram of Study Sample From the Norwegian Women and Cancer (NOWAC) Study

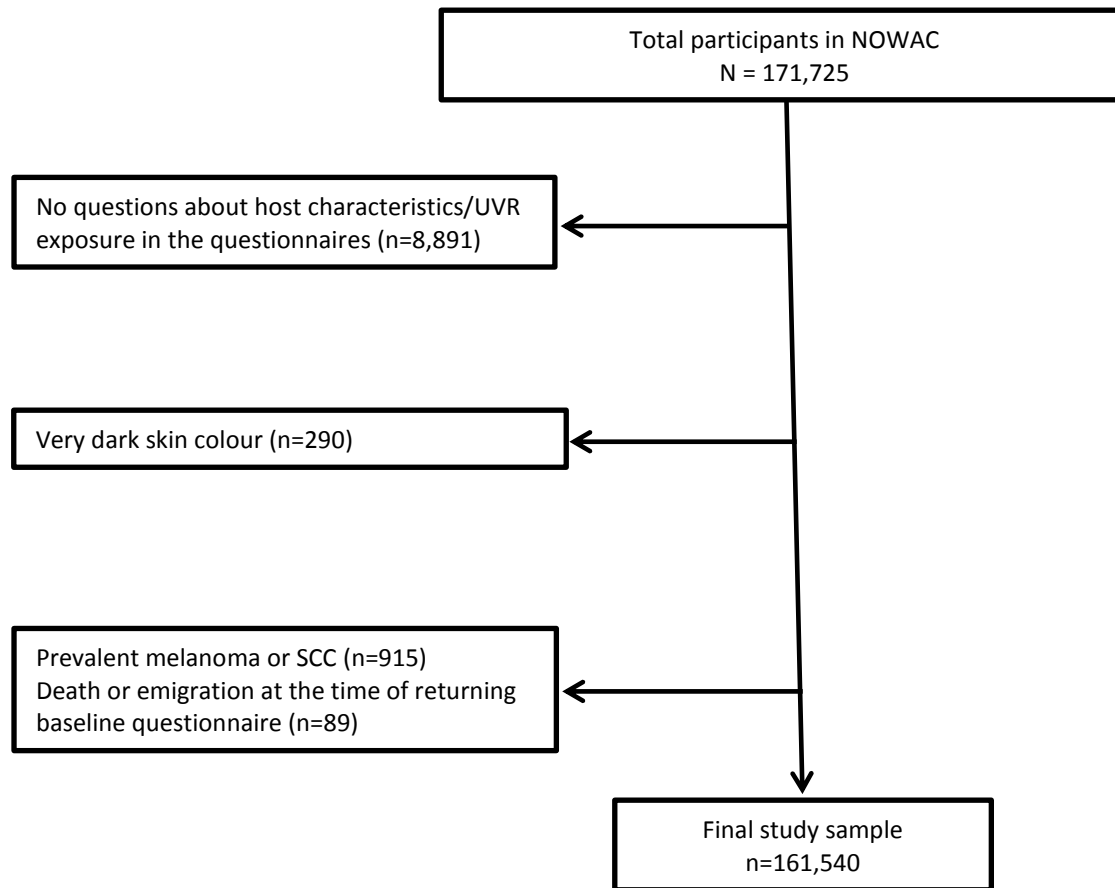

| <b>eTable 1. Odds Ratios (ORs) and 95% CIs for Age at Diagnosis, Subtype and Breslow Thickness by Body Sites of Melanoma</b>                                                                                                                                                                                                                                                                 |                              |                                   |                          |                                   |                          |                                  |                          |                                                                                                      |
|----------------------------------------------------------------------------------------------------------------------------------------------------------------------------------------------------------------------------------------------------------------------------------------------------------------------------------------------------------------------------------------------|------------------------------|-----------------------------------|--------------------------|-----------------------------------|--------------------------|----------------------------------|--------------------------|------------------------------------------------------------------------------------------------------|
|                                                                                                                                                                                                                                                                                                                                                                                              | <b>Trunk<br/>(461 cases)</b> | <b>Lower limb<br/>(520 cases)</b> |                          | <b>Upper limb<br/>(219 cases)</b> |                          | <b>Head/neck<br/>(110 cases)</b> |                          | <b>P for heterogeneity</b>                                                                           |
|                                                                                                                                                                                                                                                                                                                                                                                              | Cases                        | Cases                             | OR (95% CI) <sup>a</sup> | Cases                             | OR (95% CI) <sup>a</sup> | Cases                            | OR (95% CI) <sup>a</sup> |                                                                                                      |
| <b>Age at diagnosis (years)</b>                                                                                                                                                                                                                                                                                                                                                              |                              |                                   |                          |                                   |                          |                                  |                          |                                                                                                      |
| <50                                                                                                                                                                                                                                                                                                                                                                                          | 37                           | 76                                | 1.00                     | 17                                | 1.00                     | 9                                | 1.00                     |                                                                                                      |
| 50 – 59                                                                                                                                                                                                                                                                                                                                                                                      | 175                          | 181                               | 0.53 (0.33 – 0.85)       | 64                                | 0.77 (0.40 – 1.50)       | 28                               | 0.64 (0.26 – 1.56)       | P <sub>TL</sub> =0.008                                                                               |
| 60 – 69                                                                                                                                                                                                                                                                                                                                                                                      | 203                          | 218                               | 0.54 (0.34 – 0.86)       | 104                               | 0.94 (0.49 – 1.80)       | 43                               | 0.49 (0.20 – 1.20)       | P <sub>TL</sub> =0.009                                                                               |
| ≥70                                                                                                                                                                                                                                                                                                                                                                                          | 46                           | 45                                | 0.53 (0.28 – 1.02)       | 34                                | 2.01 (0.89 – 4.20)       | 30                               | 2.12 (0.78 – 5.74)       | P <sub>HL</sub> =0.005<br>P <sub>UL</sub> =0.001                                                     |
|                                                                                                                                                                                                                                                                                                                                                                                              |                              |                                   | P for trend=0.072        |                                   | P for trend=0.055        |                                  | P for trend=0.21         |                                                                                                      |
| <b>Subtype</b>                                                                                                                                                                                                                                                                                                                                                                               |                              |                                   |                          |                                   |                          |                                  |                          |                                                                                                      |
| SSM                                                                                                                                                                                                                                                                                                                                                                                          | 308                          | 347                               | 1.00                     | 118                               | 1.00                     | 43                               | 1.00                     |                                                                                                      |
| NM                                                                                                                                                                                                                                                                                                                                                                                           | 58                           | 68                                | 1.01 (0.64 – 1.62)       | 45                                | 2.16 (1.23 – 3.81)       | 16                               | 2.01 (0.89 – 4.57)       | P <sub>TU</sub> =0.007<br>P <sub>UL</sub> =0.006                                                     |
| LM                                                                                                                                                                                                                                                                                                                                                                                           | 3                            | 3                                 | 0.66 (0.11 – 4.00)       | 6                                 | 3.55 (0.82 – 15.30)      | 23                               | 42.87 (11.32 – 162.35)   | P <sub>HT</sub> <0.001<br>P <sub>HU</sub> <0.001<br>P <sub>HL</sub> <0.001<br>P <sub>UL</sub> =0.048 |
| Other <sup>b</sup>                                                                                                                                                                                                                                                                                                                                                                           | 91                           | 102                               | 0.98 (0.68 – 1.41)       | 48                                | 1.28 (0.79 – 2.05)       | 27                               | 2.02 (1.04 – 3.91)       | P <sub>HT</sub> =0.037<br>P <sub>HL</sub> =0.030                                                     |
| <b>Breslow thickness (mm)</b>                                                                                                                                                                                                                                                                                                                                                                |                              |                                   |                          |                                   |                          |                                  |                          |                                                                                                      |
| <0.80                                                                                                                                                                                                                                                                                                                                                                                        | 183                          | 186                               | 1.00                     | 82                                | 1.00                     | 38                               | 1.00                     |                                                                                                      |
| 0.80 – 1.00                                                                                                                                                                                                                                                                                                                                                                                  | 81                           | 100                               | 1.26 (0.88 – 1.81)       | 39                                | 1.00 (0.62 – 1.60)       | 10                               | 0.68 (0.30 – 1.50)       |                                                                                                      |
| 1.01 – 2.00                                                                                                                                                                                                                                                                                                                                                                                  | 63                           | 91                                | 1.39 (0.93 – 2.08)       | 39                                | 1.12 (0.67 – 1.87)       | 21                               | 1.54 (0.76 – 3.12)       |                                                                                                      |
| 2.01 – 4.00                                                                                                                                                                                                                                                                                                                                                                                  | 49                           | 54                                | 1.10 (0.67 – 1.80)       | 22                                | 0.65 (0.34 – 1.25)       | 10                               | 0.85 (0.34 – 2.13)       |                                                                                                      |
| >4.00                                                                                                                                                                                                                                                                                                                                                                                        | 19                           | 15                                | 0.78 (0.37 – 1.64)       | 7                                 | 0.52 (0.20 – 1.38)       | 5                                | 1.08 (0.33 – 3.50)       |                                                                                                      |
|                                                                                                                                                                                                                                                                                                                                                                                              |                              |                                   | P for trend=0.64         |                                   | P for trend=0.43         |                                  | P for trend=0.69         |                                                                                                      |
| <sup>a</sup> Multinomial logistic regression analysis adjusted for all variables in the table. Abbreviations: SSM, superficial spreading melanoma; NM, nodular melanoma; LM, lentigo maligna melanoma; T, trunk; L, lower limb; U, upper limb; H, head/neck.<br><sup>b</sup> Including other subtypes and unspecified.<br>Numbers may not add up to the subgroup totals due to missing data. |                              |                                   |                          |                                   |                          |                                  |                          |                                                                                                      |

**eTable 2.** Relative Risks (RRs) and 95% CIs for Joint Effects of Hair Color, Number of Large Asymmetric Nevi on Legs, Number of Small Symmetric Nevi on Arms/Legs, and Freckling When Sunbathing, for Risk of Melanoma Overall and Site Specific

|                                                 | Total |                          | Trunk |                          | Lower limb |                          | Upper limb |                          | Head/neck |                          |
|-------------------------------------------------|-------|--------------------------|-------|--------------------------|------------|--------------------------|------------|--------------------------|-----------|--------------------------|
|                                                 | Cases | RR (95% CI) <sup>a</sup> | Cases | RR (95% CI) <sup>a</sup> | Cases      | RR (95% CI) <sup>a</sup> | Cases      | RR (95% CI) <sup>a</sup> | Cases     | RR (95% CI) <sup>a</sup> |
| Hair colour – freckling when sunbathing         |       |                          |       |                          |            |                          |            |                          |           |                          |
| Black/dark brown – No                           | 78    | 1.00                     | 35    | 1.00                     | 23         | 1.00                     | 10         | 1.00                     | 10        | 1.00                     |
| Black/dark brown – Yes                          | 39    | 1.12 (0.76 – 1.66)       | 8     | 0.56 (0.26 – 1.21)       | 20         | 2.18 (1.20 – 3.98)       | 6          | 1.53 (0.63 – 2.51)       | 5         | 1.26 (0.42 – 3.78)       |
| Brown – No                                      | 186   | 1.07 (0.82 – 1.39)       | 67    | 0.85 (0.56 – 1.28)       | 75         | 1.50 (0.94 – 2.40)       | 27         | 1.44 (0.65 – 3.18)       | 17        | 0.80 (0.37 – 1.75)       |
| Brown – Yes                                     | 158   | 1.63 (1.24 – 2.15)       | 50    | 1.24 (0.80 – 1.92)       | 70         | 2.77 (1.72 – 4.45)       | 31         | 3.26 (1.50 – 7.10)       | 7         | 0.67 (0.25 – 1.81)       |
| Blond/yellow – No                               | 318   | 1.74 (1.35 – 2.23)       | 118   | 1.46 (1.00 – 2.14)       | 125        | 2.47 (1.58 – 3.87)       | 46         | 2.60 (1.22 – 5.55)       | 29        | 1.31 (0.63 – 2.74)       |
| Blond/yellow – Yes                              | 220   | 2.08 (1.60 – 2.71)       | 86    | 1.97 (1.32 – 2.95)       | 90         | 3.31 (2.08 – 5.27)       | 29         | 2.81 (1.28 – 6.17)       | 15        | 1.30 (0.57 – 2.99)       |
| Red – No                                        | 8     | 4.96 (2.38 – 10.34)      | 3     | 3.71 (1.14 – 12.15)      | 3          | 6.15 (1.83 – 20.69)      | 2          | 12.15 (2.56 – 57.72)     | 0         | -                        |
| Red – Yes                                       | 80    | 4.01 (2.92 – 5.52)       | 25    | 2.72 (1.61 – 4.59)       | 33         | 5.93 (3.47 – 10.16)      | 14         | 7.47 (3.15 – 17.75)      | 8         | 3.17 (1.18 – 8.54)       |
|                                                 |       | P for interaction=0.16   |       | P for interaction=0.09   |            | P for interaction=0.27   |            | P for interaction=0.20   |           | P for interaction=0.66   |
| Hair colour – Large asymmetric nevi on legs     |       |                          |       |                          |            |                          |            |                          |           |                          |
| Black/dark brown/brown – No                     | 435   | 1.00                     | 153   | 1.00                     | 178        | 1.00                     | 72         | 1.00                     | 32        | 1.00                     |
| Black/dark brown/brown – Yes                    | 50    | 2.54 (1.89 – 3.41)       | 18    | 2.39 (1.47 – 3.90)       | 21         | 2.43 (1.55 – 3.81)       | 6          | 1.73 (0.75 – 3.99)       | 5         | 3.15 (1.22 – 8.11)       |
| Blond/yellow/red – No                           | 592   | 1.61 (1.42 – 1.83)       | 212   | 1.68 (1.36 – 2.07)       | 233        | 1.60 (1.31 – 1.95)       | 98         | 1.68 (1.23 – 2.29)       | 49        | 1.83 (1.17 – 2.86)       |
| Blond/yellow/red – Yes                          | 108   | 5.54 (4.48 – 6.86)       | 36    | 4.94 (3.44 – 7.09)       | 51         | 6.10 (4.47 – 8.35)       | 13         | 3.96 (2.19 – 7.14)       | 8         | 5.16 (2.35 – 11.35)      |
|                                                 |       | P for interaction=0.09   |       | P for interaction=0.47   |            | P for interaction=0.09   |            | P for interaction=0.49   |           | P for interaction=0.70   |
| Hair colour – Small symmetric nevi on arms/legs |       |                          |       |                          |            |                          |            |                          |           |                          |
| Black/dark brown/brown – ≤10                    | 111   | 1.00                     | 31    | 1.00                     | 41         | 1.00                     | 23         | 1.00                     | 16        | 1.00                     |
| Black/dark brown/brown – >10                    | 187   | 2.10 (1.66 – 2.66)       | 62    | 2.60 (1.68 – 4.03)       | 78         | 2.36 (1.60 – 3.46)       | 33         | 2.03 (1.19 – 3.46)       | 14        | 1.33 (0.65 – 2.73)       |
| Blond/yellow/red – ≤10                          | 157   | 1.60 (1.25 – 2.04)       | 47    | 1.73 (1.09 – 2.73)       | 66         | 1.77 (1.20 – 2.62)       | 30         | 1.47 (0.84 – 2.55)       | 14        | 0.90 (0.44 – 1.86)       |
| Blond/yellow/red – >10                          | 255   | 3.41 (2.72 – 4.27)       | 102   | 5.17 (3.43 – 7.78)       | 97         | 3.41 (2.35 – 4.95)       | 37         | 2.70 (1.60 – 4.57)       | 19        | 2.00 (1.03 – 3.89)       |
|                                                 |       | P for interaction=0.65   |       | P for interaction=0.78   |            | P for interaction=0.34   |            | P for interaction=0.92   |           | P for interaction=0.25   |

<sup>a</sup> Poisson regression analysis adjusted for attained age, birth-cohort, skin colour, and residential ambient ultraviolet radiation exposure.
